# Supplementary material for: Baseline identification of clonal V(D)J sequences for DNA-based minimal residual disease detection in multiple myeloma
Source: PubMed Central journal article supplement (PMC6430394; doi:10.1371/journal.pone.0211600), 2019-03-22

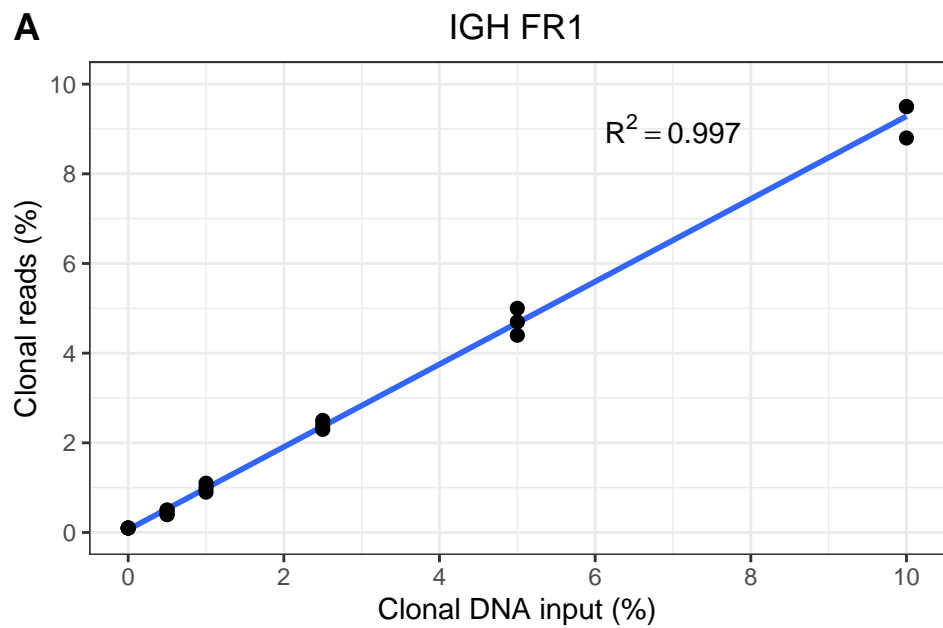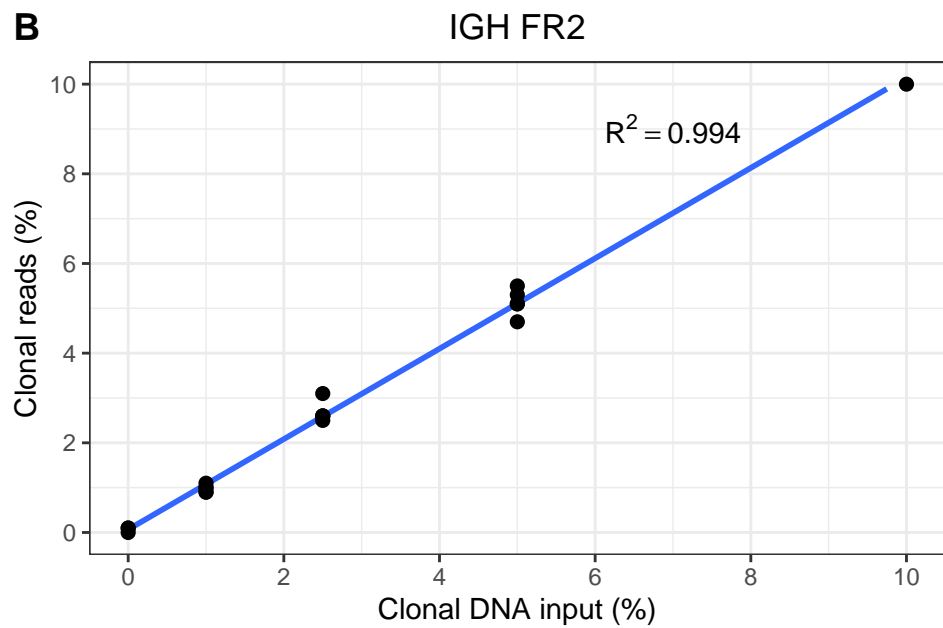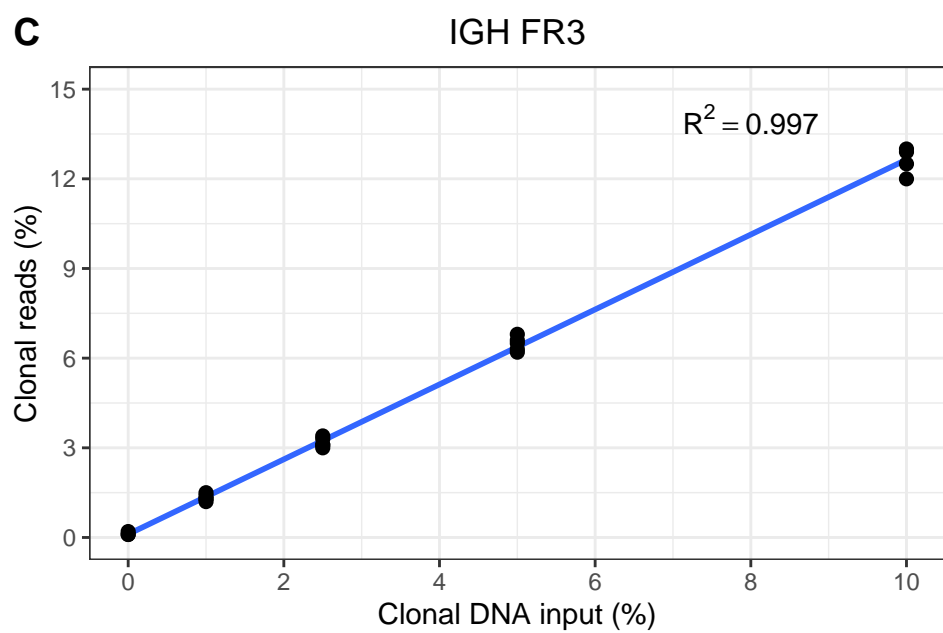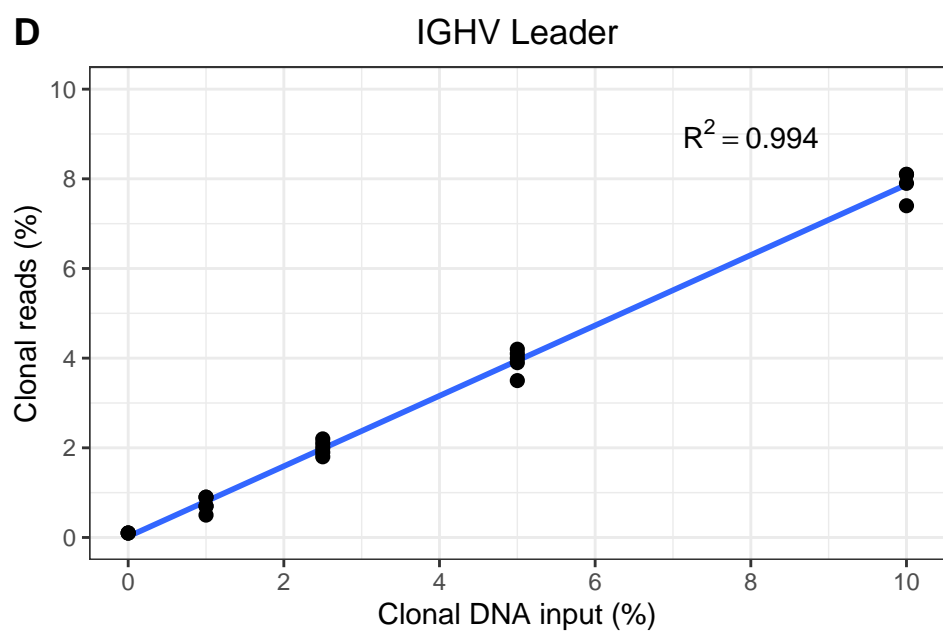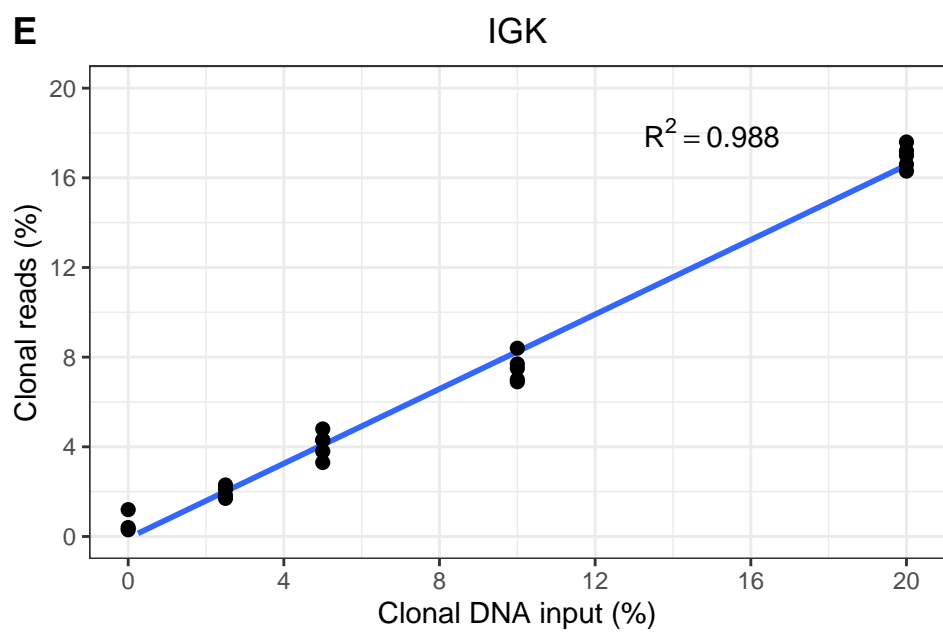

Supplement: pone.0211600.s002.pdf [file pone.0211600.s002.pdf]
